# Supplementary material for: Delay discounting, probability discounting, and interdental cleaning frequency
Source: Springer Nature journal article supplement (doi:10.1186/s12903-022-02328-6), 2022-07-29
Supplement: MOESM2 [file 23318272]

## Training Block

Prior to beginning the study, you will be required to complete 3 slider/percentage training questions, followed by a 4-question percentage comprehension test. If you do not pass the percentage comprehension test, you will be excluded from the study and ineligible for compensation. Please pay careful attention to the following examples and questions. This section should take less than 3 minutes. If you exit out of this survey, you will not be able to reopen it.

In the following questions you will be asked a series of questions involving ratios and the corresponding percentages associated with them. You will be using a slider bar to identify your answer. Understanding percentages is key to this study, as most questions will be in this format. Every answer will require to move or click the slider, even if it is already at the value you wish to choose. Below are some examples of how choosing between two options work in the context of this survey.

Selecting 100% A and 0% B

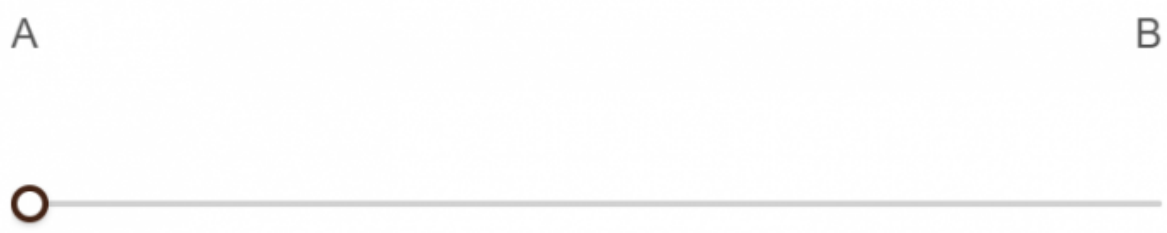

Selecting 75% A and 25% B

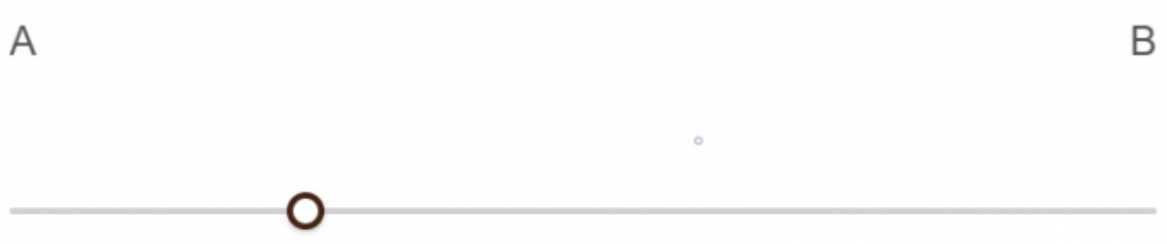

Selecting 50% A and 50% B

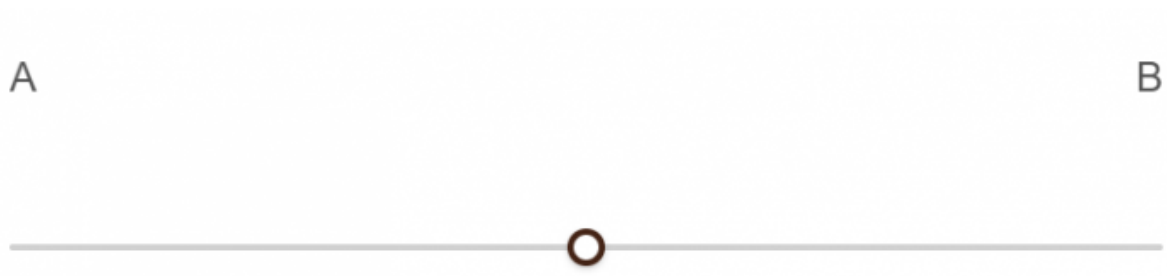

Selecting 75% B and 25% A

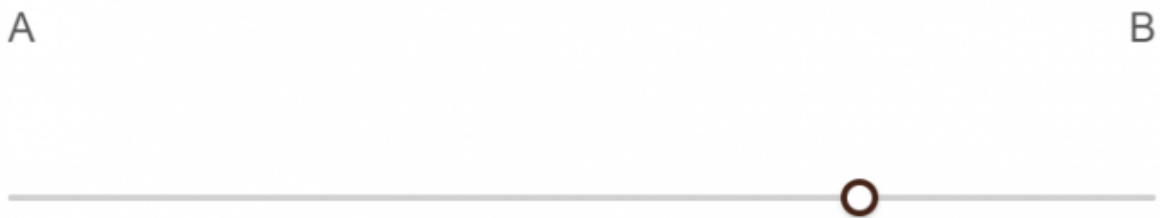

Selecting 100% B and 0% A

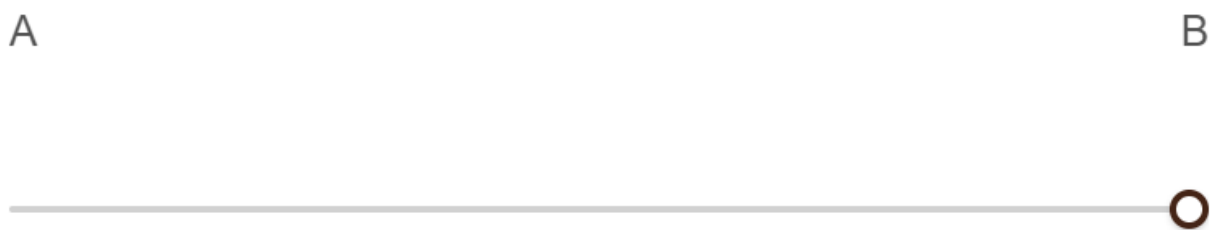

If you were to choose A 50% of the time and B 50% of the time, you would move the slider to the position seen below.

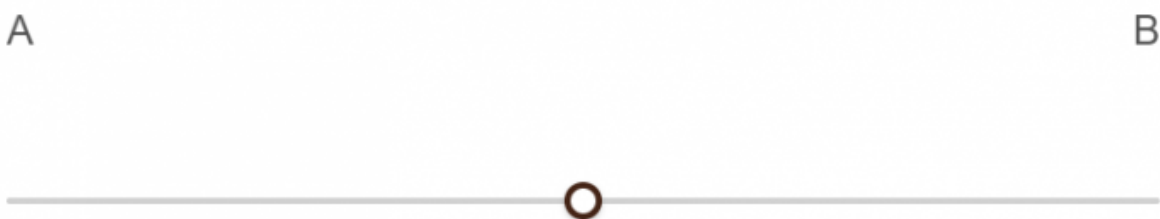

Please move the slider as if though you were choosing **A 50%** of the time and **B 50%** of the time

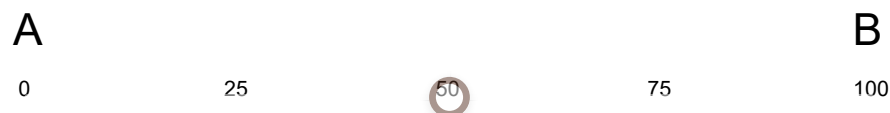

If you were to choose A 100% of the time and B 0% of the time, you would move the slider to the leftmost position seen below.

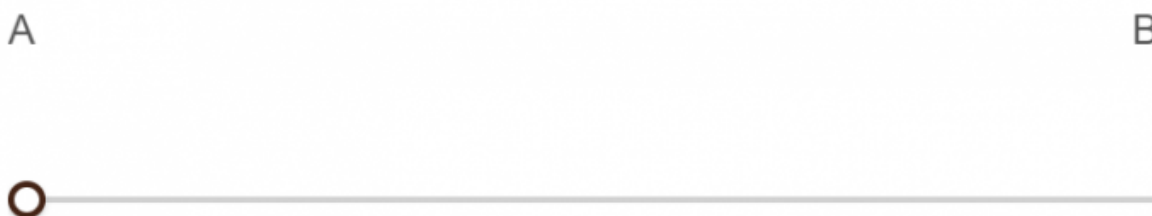

Please move the slider as if though you were choosing **A 100%** of the time and **B 0%** of the time

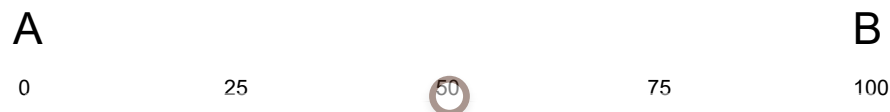

If you were to choose B 75% of the time and A 25% of the time, you would move the slider to the position seen below.

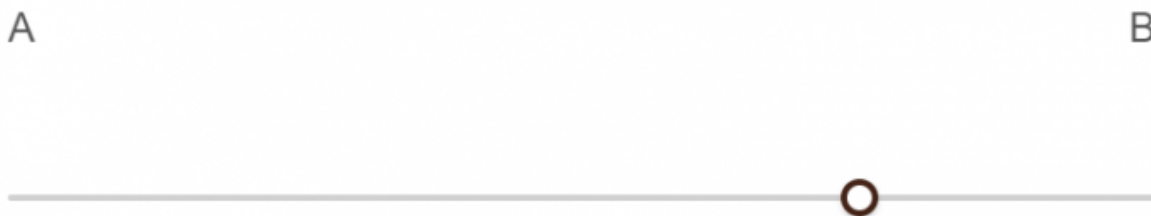

Please move the slider as if though you were choosing **B 75%** of the time and **A 25%** of the time

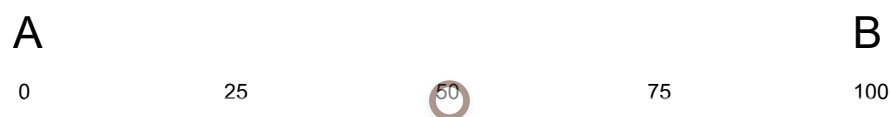

You will now be tested on the previous content. Understanding percentages and the slider is necessary to continue on to the study. If you do not get all the four following questions correct you will be considered ineligible and removed from the study. You will only have one chance to answer these correctly, so please pay attention to the questions carefully. You will not get compensated if you are removed from the study in this way.

## Testing Block

If you would **100%** choose **A** over B, move the slider to the correct spot

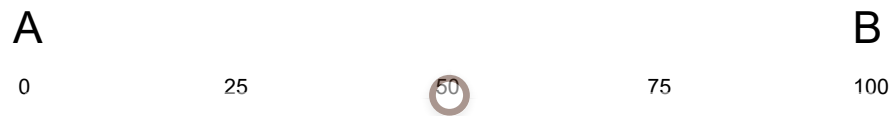

If you would choose **A 75%** of the time and **B 25%** of the time, move the slider to the correct spot

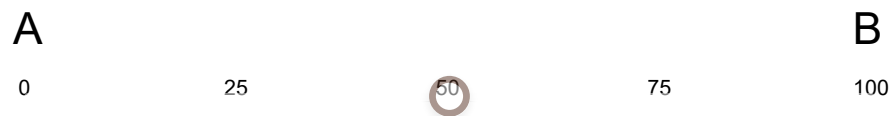

If you would choose **B 50%** of the time and **A 50%** of the time, move the slider to the correct spot

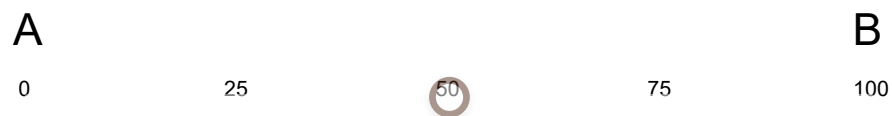

If you would **100%** choose **B** over A, move the slider to the correct spot

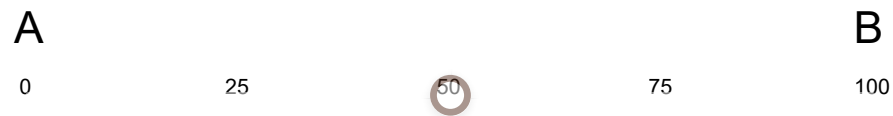

## Fail Screener

You did not pass the screener question.

When you press next, you will be exited from the survey.

## Discounting Gain Questions Break

You have successfully completed the screener.

The following questions will consist of hypothetical choices between two monetary values that will vary in their likelihood and delay to getting the money. Answer these questions to the best of your ability and as if the situation were real. Note that there is no wrong way to answer these questions.

## Delay Discounting Gain Small

What is the likelihood that you would select  
**gaining \$500 immediately** over **gaining \$1,000 in 1 day?**

Gain \$500 immediately

Gain \$1,000 in 1 day

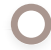

What is the likelihood that you would select  
**gaining \$500 immediately** over **gaining \$1,000 in 1 month?**

Gain \$500 immediately

Gain \$1,000 in 1 month

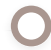

What is the likelihood that you would select  
**gaining \$500 immediately** over **gaining \$1,000 in 6 months?**

Gain \$500 immediately

Gain \$1,000 in 6 months

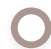



What is the likelihood that you would select  
**gaining \$500 immediately** over **gaining \$1,000** in **1 year**?

Gain \$500 immediately

Gain \$1,000 in 1 year



What is the likelihood that you would select  
**gaining \$500 immediately** over **gaining \$1,000** in **2 years**?

Gain \$500 immediately

Gain \$1,000 in 2 years



### Delay Discounting Loss Small

What is the likelihood that you would select  
**losing \$500 immediately** over **losing \$1,000** in **1 day**?

Lose \$500 immediately

Lose \$1,000 in 1 day

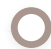

What is the likelihood that you would select  
**losing \$500 immediately** over **losing \$1,000** in **1 month**?

Lose \$500 immediately

Lose \$1,000 in 1 month

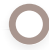

What is the likelihood that you would select  
**losing \$500 immediately** over **losing \$1,000** in **6 months**?

Lose \$500 immediately

Lose \$1,000 in 6 months

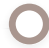

What is the likelihood that you would select  
**losing \$500 immediately** over **losing \$1,000** in **1 year**?

Lose \$500 immediately

Lose \$1,000 in 1 year

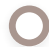

What is the likelihood that you would select **losing \$500 immediately** over **losing \$1,000 in 2 years**?

Lose \$500 immediately

Lose \$1,000 in 2 years



### Probability Discounting Gain Small

What is the likelihood that you would select a **100% chance of gaining \$500** over a **99% chance of gaining \$1,000**?

100% chance to gain \$500

99% chance to gain \$1,000

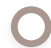

What is the likelihood that you would select a **100% chance of gaining \$500** over an **80% chance of gaining \$1,000**?

100% chance to gain \$500

80% chance to gain \$1,000



What is the likelihood that you would select a **100% chance of gaining \$500** over a **50% chance of gaining \$1,000**?

100% chance to gain \$500

50% chance to gain \$1,000

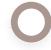

What is the likelihood that you would select a **100% chance of gaining \$500** over a **20% chance of gaining \$1,000**?

100% chance to gain \$500

20% chance to gain \$1,000

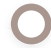

What is the likelihood that you would select a **100% chance of gaining \$500** over a **1% chance of gaining \$1,000**?

100% chance to gain \$500

1% chance to gain \$1,000

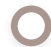

## Probability Discounting Loss Small

What is the likelihood that you would select a **100% chance of losing \$500** over a **99% chance of losing \$1,000**?

100% chance to lose \$500

99% chance to lose \$1,000

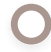

What is the likelihood that you would select a **100% chance of losing \$500** over an **80% chance of losing \$1,000**?

100% chance to lose \$500

80% chance to lose \$1,000



What is the likelihood that you would select a **100% chance of losing \$500** over a **50% chance of losing \$1,000**?

100% chance to lose \$500

50% chance to lose \$1,000



What is the likelihood that you would select a **100% chance of losing \$500** over a **20% chance of losing \$1,000**?

100% chance to lose \$500

20% chance to lose \$1,000

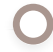

What is the likelihood that you would select a **100% chance of losing \$500** over a **1% chance of losing \$1,000**?

100% chance to lose \$500

1% chance to lose \$1,000

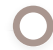

## Health Break

The following questions will ask you to imagine having experienced a particular symptom at a certain severity for some period of time with a given cost to access healthcare. **Assume that these symptoms are NOT related to COVID-19.** Answer the following questions as if the situation were real. Note that there is no wrong way to answer these questions.

## Mild Headaches 10\$

You have been experiencing **mild headaches** for the past **6 hours**. It will **cost you \$10** to contact or see a healthcare professional. How likely are you to contact or see healthcare professional for your symptoms?

0% chance of contacting/seeing healthcare professional at \$10

Mild headaches for 6 hours

100% chance of contacting/seeing healthcare professional at \$10

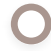

You have been experiencing **mild headaches** for the past **day**. It will **cost you \$10** to contact or see a healthcare professional. How likely are you to contact or see healthcare professional for your symptoms?

0% chance of contacting/seeing healthcare professional at \$10

Mild headaches for 1 day

100% chance of contacting/seeing healthcare professional at \$10

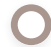

You have been experiencing **mild headaches** for the past **week**. It will **cost you \$10** to contact or see a healthcare professional. How likely are you to contact or see healthcare professional for your symptoms?

0% chance of contacting/seeing healthcare professional at \$10

Mild headaches for 1 week

100% chance of contacting/seeing healthcare professional at \$10

You have been experiencing **mild headaches** for the past **month**. It will **cost you \$10** to contact or see a healthcare professional. How likely are you to contact or see healthcare professional for your symptoms?

0% chance of contacting/seeing healthcare professional at \$10

Mild headaches for 1 month

100% chance of contacting/seeing healthcare professional at \$10



You have been experiencing **mild headaches** for the past **6 months**. It will **cost you \$10** to contact or see a healthcare professional. How likely are you to contact or see healthcare professional for your symptoms?

0% chance of  
contacting/seeing  
healthcare  
professional at  
\$10

Mild  
headaches  
for 6 months

100% chance of  
contacting/seeing  
healthcare  
professional at  
\$10

### Severe Headaches 10\$

You have been experiencing **severe headaches** for the past **6 hours**. It will **cost you \$10** to contact or see a healthcare professional. How likely are you to contact or see healthcare professional for your symptoms?

0% chance of  
contacting/seeing  
healthcare  
professional at  
\$10

Severe  
headaches  
for 6 hours

100% chance of  
contacting/seeing  
healthcare  
professional at  
\$10

You have been experiencing **severe headaches** for the past **day**. It will **cost you \$10** to contact or see a healthcare professional. How likely are you to contact or see healthcare professional for your symptoms?

0% chance of contacting/seeing healthcare professional at \$10

Severe headaches for 1 day

100% chance of contacting/seeing healthcare professional at \$10

You have been experiencing **severe headaches** for the past **week**. It will **cost you \$10** to contact or see a healthcare professional. How likely are you to contact or see healthcare professional for your symptoms?

0% chance of contacting/seeing healthcare professional at \$10

Severe headaches for 1 week

100% chance of contacting/seeing healthcare professional at \$10

You have been experiencing **severe headaches** for the past **month**. It will **cost you \$10** to contact or see a healthcare professional. How likely are you to contact or see healthcare professional for your symptoms?

0% chance of  
contacting/seeing  
healthcare  
professional at  
\$10

Severe  
headaches  
for 1 month

100% chance of  
contacting/seeing  
healthcare  
professional at  
\$10

You have been experiencing **severe headaches** for the past **6 months**. It will **cost you \$10** to contact or see a healthcare professional. How likely are you to contact or see healthcare professional for your symptoms?

0% chance of  
contacting/seeing  
healthcare  
professional at  
\$10

Severe  
headaches  
for 6 months

100% chance of  
contacting/seeing  
healthcare  
professional at  
\$10

**Mild headaches 1000\$**

You have been experiencing **mild headaches** for the past **6 hours**.  
It will **cost you \$1,000** to contact or see a healthcare professional.  
How likely are you to contact or see healthcare professional for your  
symptoms?

0% chance of  
contacting/seeing  
healthcare  
professional at  
\$1,000

Mild  
headaches  
for 6 hours

100% chance of  
contacting/seeing  
healthcare  
professional at  
\$1,000

You have been experiencing **mild headaches** for the past **day**. It  
will **cost you \$1,000** to contact or see a healthcare professional.  
How likely are you to contact or see healthcare professional for your  
symptoms?

0% chance of  
contacting/seeing  
healthcare  
professional at  
\$1,000

Mild  
headaches  
for 1 day

100% chance of  
contacting/seeing  
healthcare  
professional at  
\$1,000

You have been experiencing **mild headaches** for the past **week**. It will **cost you \$1,000** to contact or see a healthcare professional. How likely are you to contact or see healthcare professional for your symptoms?

0% chance of contacting/seeing healthcare professional at \$1,000

Mild headaches for 1 week

100% chance of contacting/seeing healthcare professional at \$1,000

You have been experiencing **mild headaches** for the past **month**. It will **cost you \$1,000** to contact or see a healthcare professional. How likely are you to contact or see healthcare professional for your symptoms?

0% chance of contacting/seeing healthcare professional at \$1,000

Mild headaches for 1 month

100% chance of contacting/seeing healthcare professional at \$1,000

You have been experiencing **mild headaches** for the past **6 months**. It will **cost you \$1,000** to contact or see a healthcare professional. How likely are you to contact or see healthcare professional for your symptoms?

0% chance of  
contacting/seeing  
healthcare  
professional at  
\$1,000

Mild  
headaches  
for 6 months

100% chance of  
contacting/seeing  
healthcare  
professional at  
\$1,000

### Severe headaches \$1000

You have been experiencing **severe headaches** for the past **6 hours**. It will **cost you \$1,000** to contact or see a healthcare professional. How likely are you to contact or see healthcare professional for your symptoms?

0% chance of  
contacting/seeing  
healthcare  
professional at  
\$1,000

Severe  
headaches  
for 6 hours

100% chance of  
contacting/seeing  
healthcare  
professional at  
\$1,000

You have been experiencing **severe headaches** for the past **day**. It will **cost you \$1,000** to contact or see a healthcare professional. How likely are you to contact or see healthcare professional for your symptoms?

0% chance of contacting/seeing healthcare professional at \$1,000

Severe headaches for 1 day

100% chance of contacting/seeing healthcare professional at \$1,000

You have been experiencing **severe headaches** for the past **week**. It will **cost you \$1,000** to contact or see a healthcare professional. How likely are you to contact or see healthcare professional for your symptoms?

0% chance of contacting/seeing healthcare professional at \$1,000

Severe headaches for 1 week

100% chance of contacting/seeing healthcare professional at \$1,000

You have been experiencing **severe headaches** for the past **month**.  
It will **cost you \$1,000** to contact or see a healthcare professional.  
How likely are you to contact or see healthcare professional for your  
symptoms?

0% chance of  
contacting/seeing  
healthcare  
professional at  
\$1,000

Severe  
headaches  
for 1 month

100% chance of  
contacting/seeing  
healthcare  
professional at  
\$1,000

You have been experiencing **severe headaches** for the past  
**6 months**. It will **cost you \$1,000** to contact or see a healthcare  
professional. How likely are you to contact or see healthcare  
professional for your symptoms?

0% chance of  
contacting/seeing  
healthcare  
professional at  
\$1,000

Severe  
headaches  
for 6 months

100% chance of  
contacting/seeing  
healthcare  
professional at  
\$1,000

**Mild cough \$10**



You have been experiencing a **mild cough** for the past **6 hours**. It will **cost you \$10** to contact or see a healthcare professional. How likely are you to contact or see healthcare professional for your symptoms?

0% chance of contacting/seeing healthcare professional at \$10

Mild cough for 6 hours

100% chance of contacting/seeing healthcare professional at \$10

You have been experiencing a **mild cough** for the past **day**. It will **cost you \$10** to contact or see a healthcare professional. How likely are you to contact or see healthcare professional for your symptoms?

0% chance of contacting/seeing healthcare professional at \$10

Mild cough for 1 day

100% chance of contacting/seeing healthcare professional at \$10

You have been experiencing a **mild cough** for the past **week**. It will **cost you \$10** to contact or see a healthcare professional. How likely are you to contact or see healthcare professional for your symptoms?

0% chance of  
contacting/seeing  
healthcare  
professional at  
\$10

Mild cough for  
1 week

100% chance of  
contacting/seeing  
healthcare  
professional at  
\$10

You have been experiencing a **mild cough** for the past **month**. It will **cost you \$10** to contact or see a healthcare professional. How likely are you to contact or see healthcare professional for your symptoms?

0% chance of  
contacting/seeing  
healthcare  
professional at  
\$10

Mild cough for  
1 month

100% chance of  
contacting/seeing  
healthcare  
professional at  
\$10

You have been experiencing a **mild cough** for the past **6 months**. It will **cost you \$10** to contact or see a healthcare professional. How likely are you to contact or see healthcare professional for your symptoms?

0% chance of contacting/seeing healthcare professional at \$10

Mild cough for 6 months

100% chance of contacting/seeing healthcare professional at \$10

### **severe cough \$10**

You have been experiencing a **severe cough** for the past **6 hours**. It will **cost you \$10** to contact or see a healthcare professional. How likely are you to contact or see healthcare professional for your symptoms?

0% chance of contacting/seeing healthcare professional at \$10

Severe cough for 6 hours

100% chance of contacting/seeing healthcare professional at \$10

You have been experiencing a **severe cough** for the past **day**. It will **cost you \$10** to contact or see a healthcare professional. How likely are you to contact or see healthcare professional for your symptoms?

0% chance of  
contacting/seeing  
healthcare  
professional at  
\$10

Severe cough  
for 1 day

100% chance of  
contacting/seeing  
healthcare  
professional at  
\$10

You have been experiencing a **severe cough** for the past **week**. It will **cost you \$10** to contact or see a healthcare professional. How likely are you to contact or see healthcare professional for your symptoms?

0% chance of  
contacting/seeing  
healthcare  
professional at  
\$10

Severe cough  
for 1 week

100% chance of  
contacting/seeing  
healthcare  
professional at  
\$10

You have been experiencing a **severe cough** for the past **month**. It will **cost you \$10** to contact or see a healthcare professional. How likely are you to contact or see healthcare professional for your symptoms?

0% chance of  
contacting/seeing  
healthcare  
professional at  
\$10

Severe cough  
for 1 month

100% chance of  
contacting/seeing  
healthcare  
professional at  
\$10

You have been experiencing a **severe cough** for the past **6 months**. It will **cost you \$10** to contact or see a healthcare professional. How likely are you to contact or see healthcare professional for your symptoms?

0% chance of  
contacting/seeing  
healthcare  
professional at  
\$10

Severe cough  
for 6 months

100% chance of  
contacting/seeing  
healthcare  
professional at  
\$10

**mild cough \$1000**

You have been experiencing a **mild cough** for the past **6 hours**. It will **cost you \$1,000** to contact or see a healthcare professional. How likely are you to contact or see healthcare professional for your symptoms?

0% chance of contacting/seeing healthcare professional at \$1,000

Mild cough for 6 hours

100% chance of contacting/seeing healthcare professional at \$1,000

You have been experiencing a **mild cough** for the past **day**. It will **cost you \$1,000** to contact or see a healthcare professional. How likely are you to contact or see healthcare professional for your symptoms?

0% chance of contacting/seeing healthcare professional at \$1,000

Mild cough for 1 day

100% chance of contacting/seeing healthcare professional at \$1,000

You have been experiencing a **mild cough** for the past **week**. It will **cost you \$1,000** to contact or see a healthcare professional. How likely are you to contact or see healthcare professional for your symptoms?

0% chance of contacting/seeing healthcare professional at \$1,000

Mild cough for 1 week

100% chance of contacting/seeing healthcare professional at \$1,000

You have been experiencing a **mild cough** for the past **month**. It will **cost you \$1,000** to contact or see a healthcare professional. How likely are you to contact or see healthcare professional for your symptoms?

0% chance of contacting/seeing healthcare professional at \$1,000

Mild cough for 1 month

100% chance of contacting/seeing healthcare professional at \$1,000

You have been experiencing a **mild cough** for the past **6 months**. It will **cost you \$1,000** to contact or see a healthcare professional. How likely are you to contact or see healthcare professional for your symptoms?

0% chance of contacting/seeing healthcare professional at \$1,000

Mild cough for 6 months

100% chance of contacting/seeing healthcare professional at \$1,000

### **severe cough \$1000**

You have been experiencing a **severe cough** for the past **6 hours**. It will **cost you \$1,000** to contact or see a healthcare professional. How likely are you to contact or see healthcare professional for your symptoms?

0% chance of contacting/seeing healthcare professional at \$1,000

Severe cough for 6 hours

100% chance of contacting/seeing healthcare professional at \$1,000



You have been experiencing a **severe cough** for the past **day**. It will **cost you \$1,000** to contact or see a healthcare professional. How likely are you to contact or see healthcare professional for your symptoms?

0% chance of contacting/seeing healthcare professional at \$1,000

Severe cough for 1 day

100% chance of contacting/seeing healthcare professional at \$1,000

You have been experiencing a **severe cough** for the past **week**. It will **cost you \$1,000** to contact or see a healthcare professional. How likely are you to contact or see healthcare professional for your symptoms?

0% chance of contacting/seeing healthcare professional at \$1,000

Severe cough for 1 week

100% chance of contacting/seeing healthcare professional at \$1,000

You have been experiencing a **severe cough** for the past **month**. It will **cost you \$1,000** to contact or see a healthcare professional. How likely are you to contact or see healthcare professional for your symptoms?

0% chance of contacting/seeing healthcare professional at \$1,000

Severe cough for 1 month

100% chance of contacting/seeing healthcare professional at \$1,000

You have been experiencing a **severe cough** for the past **6 months**. It will **cost you \$1,000** to contact or see a healthcare professional. How likely are you to contact or see healthcare professional for your symptoms?

0% chance of contacting/seeing healthcare professional at \$1,000

Severe cough for 6 months

100% chance of contacting/seeing healthcare professional at \$1,000

**Mild nausea 10\$**

You have been experiencing **mild nausea** for the past **6 hours**. It will **cost you \$10** to contact or see a healthcare professional. How likely are you to contact or see healthcare professional for your symptoms?

0% chance of contacting/seeing healthcare professional at \$10

Mild nausea for 6 hours

100% chance of contacting/seeing healthcare professional at \$10

You have been experiencing **mild nausea** for the past **day**. It will **cost you \$10** to contact or see a healthcare professional. How likely are you to contact or see healthcare professional for your symptoms?

0% chance of contacting/seeing healthcare professional at \$10

Mild nausea for 1 day

100% chance of contacting/seeing healthcare professional at \$10

You have been experiencing **mild nausea** for the past **week**. It will **cost you \$10** to contact or see a healthcare professional. How likely are you to contact or see healthcare professional for your symptoms?

0% chance of contacting/seeing healthcare professional at \$10

Mild nausea for 1 week

100% chance of contacting/seeing healthcare professional at \$10

You have been experiencing **mild nausea** for the past **month**. It will **cost you \$10** to contact or see a healthcare professional. How likely are you to contact or see healthcare professional for your symptoms?

0% chance of contacting/seeing healthcare professional at \$10

Mild nausea for 1 month

100% chance of contacting/seeing healthcare professional at \$10

You have been experiencing **mild nausea** for the past **6 months**. It will **cost you \$10** to contact or see a healthcare professional. How likely are you to contact or see healthcare professional for your symptoms?

0% chance of  
contacting/seeing  
healthcare  
professional at  
\$10

Mild nausea  
for 6 months

100% chance of  
contacting/seeing  
healthcare  
professional at  
\$10

### Severe Nausea \$10

You have been experiencing **severe nausea** for the past **6 hours**. It will **cost you \$10** to contact or see a healthcare professional. How likely are you to contact or see healthcare professional for your symptoms?

0% chance of  
contacting/seeing  
healthcare  
professional at  
\$10

Severe  
nausea for 6  
hours

100% chance of  
contacting/seeing  
healthcare  
professional at  
\$10

You have been experiencing **severe nausea** for the past **day**. It will **cost you \$10** to contact or see a healthcare professional. How likely are you to contact or see healthcare professional for your symptoms?

0% chance of  
contacting/seeing  
healthcare  
professional at  
\$10

Severe  
nausea for 1  
day

100% chance of  
contacting/seeing  
healthcare  
professional at  
\$10

You have been experiencing **severe nausea** for the past **week**. It will **cost you \$10** to contact or see a healthcare professional. How likely are you to contact or see healthcare professional for your symptoms?

0% chance of  
contacting/seeing  
healthcare  
professional at  
\$10

Severe  
nausea for 1  
week

100% chance of  
contacting/seeing  
healthcare  
professional at  
\$10

You have been experiencing **severe nausea** for the past **month**. It will **cost you \$10** to contact or see a healthcare professional. How likely are you to contact or see healthcare professional for your symptoms?

0% chance of contacting/seeing healthcare professional at \$10

Severe nausea for 1 month

100% chance of contacting/seeing healthcare professional at \$10

You have been experiencing **severe nausea** for the past **6 months**. It will **cost you \$10** to contact or see a healthcare professional. How likely are you to contact or see healthcare professional for your symptoms?

0% chance of contacting/seeing healthcare professional at \$10

Severe nausea for 6 months

100% chance of contacting/seeing healthcare professional at \$10

**mild nausea \$1000**

You have been experiencing **mild nausea** for the past **6 hours**. It will **cost you \$1,000** to contact or see a healthcare professional. How likely are you to contact or see healthcare professional for your symptoms?

0% chance of contacting/seeing healthcare professional at \$1,000

Mild nausea for 6 hours

100% chance of contacting/seeing healthcare professional at \$1,000

You have been experiencing **mild nausea** for the past **day**. It will **cost you \$1,000** to contact or see a healthcare professional. How likely are you to contact or see healthcare professional for your symptoms?

0% chance of contacting/seeing healthcare professional at \$1,000

Mild nausea for 1 day

100% chance of contacting/seeing healthcare professional at \$1,000



You have been experiencing **mild nausea** for the past **week**. It will **cost you \$1,000** to contact or see a healthcare professional. How likely are you to contact or see healthcare professional for your symptoms?

0% chance of contacting/seeing healthcare professional at \$1,000

Mild nausea for 1 week

100% chance of contacting/seeing healthcare professional at \$1,000

You have been experiencing **mild nausea** for the past **month**. It will **cost you \$1,000** to contact or see a healthcare professional. How likely are you to contact or see healthcare professional for your symptoms?

0% chance of contacting/seeing healthcare professional at \$1,000

Mild nausea for 1 month

100% chance of contacting/seeing healthcare professional at \$1,000

You have been experiencing **mild nausea** for the past **6 months**. It will **cost you \$1,000** to contact or see a healthcare professional. How likely are you to contact or see healthcare professional for your symptoms?

0% chance of contacting/seeing healthcare professional at \$1,000

Mild nausea for 6 months

100% chance of contacting/seeing healthcare professional at \$1,000

### Severe nausea \$1000

You have been experiencing **severe nausea** for the past **6 hours**. It will **cost you \$1,000** to contact or see a healthcare professional. How likely are you to contact or see healthcare professional for your symptoms?

0% chance of contacting/seeing healthcare professional at \$1,000

Severe nausea for 6 hours

100% chance of contacting/seeing healthcare professional at \$1,000

You have been experiencing **severe nausea** for the past **day**. It will **cost you \$1,000** to contact or see a healthcare professional. How likely are you to contact or see healthcare professional for your symptoms?

0% chance of contacting/seeing healthcare professional at \$1,000

Severe nausea for 1 day

100% chance of contacting/seeing healthcare professional at \$1,000

You have been experiencing **severe nausea** for the past **week**. It will **cost you \$1,000** to contact or see a healthcare professional. How likely are you to contact or see healthcare professional for your symptoms?

0% chance of contacting/seeing healthcare professional at \$1,000

Severe nausea for 1 week

100% chance of contacting/seeing healthcare professional at \$1,000

You have been experiencing **severe nausea** for the past **month**. It will **cost you \$1,000** to contact or see a healthcare professional. How likely are you to contact or see healthcare professional for your symptoms?

0% chance of contacting/seeing healthcare professional at \$1,000

Severe nausea for 1 month

100% chance of contacting/seeing healthcare professional at \$1,000

You have been experiencing **severe nausea** for the past **6 months**. It will **cost you \$1,000** to contact or see a healthcare professional. How likely are you to contact or see healthcare professional for your symptoms?

0% chance of contacting/seeing healthcare professional at \$1,000

Severe nausea for 6 months

100% chance of contacting/seeing healthcare professional at \$1,000

**Attention Check**

Would you rather have \$1000 immediately or have \$1 in a year?

\$1000 immediately

\$1 in a year

## Demographics break

You will now be asked a series of demographic and health-related questions.

## Symptom Concerns: All

With regard to nausea, what is your overall concern about experiencing...

|                    | Not at all<br>concerned | Somewhat<br>Concerned | Very<br>Concerned |   |   |   |                      |
|--------------------|-------------------------|-----------------------|-------------------|---|---|---|----------------------|
|                    | 0                       | 1                     | 2                 | 3 | 4 | 5 | 6                    |
| Mild Nausea        |                         |                       |                   |   |   |   | <input type="text"/> |
| Moderate<br>Nausea |                         |                       |                   |   |   |   | <input type="text"/> |
| Severe<br>Nausea   |                         |                       |                   |   |   |   | <input type="text"/> |

With regard to headaches, what is your overall concern about experiencing...

|                       | Not at all<br>concerned | Somewhat<br>Concerned | Very<br>Concerned |   |   |   |                      |
|-----------------------|-------------------------|-----------------------|-------------------|---|---|---|----------------------|
|                       | 0                       | 1                     | 2                 | 3 | 4 | 5 | 6                    |
| Mild<br>Headaches     |                         |                       |                   |   |   |   | <input type="text"/> |
| Moderate<br>Headaches |                         |                       |                   |   |   |   | <input type="text"/> |
| Severe<br>Headaches   |                         |                       |                   |   |   |   | <input type="text"/> |

With regard to coughing, what is your overall concern about experiencing...

|                      | Not at all<br>concerned | Somewhat<br>Concerned | Very<br>Concerned |   |   |   |                      |
|----------------------|-------------------------|-----------------------|-------------------|---|---|---|----------------------|
|                      | 0                       | 1                     | 2                 | 3 | 4 | 5 | 6                    |
| Mild Coughing        |                         |                       |                   |   |   |   | <input type="text"/> |
| Moderate<br>Coughing |                         |                       |                   |   |   |   | <input type="text"/> |
| Severe<br>Coughing   |                         |                       |                   |   |   |   | <input type="text"/> |

## Basic Demographics

The following questions are either fill in the blank or multiple choice.

Please answer all these questions to the best of your abilities. All fields need to be filled to continue. If in a fill-in-the-blank option you are not sure, simply put NA or unsure in the text box.

## Basic Demographics

Age

Gender Identity

## Ethnic Identity

- Asian
- Black/African
- Caucasian
- Hispanic/Latin
- Pacific Islander
- Specify
- Prefer not to answer

What is the highest level of school you have completed or the highest degree you have received?

- Less than high school degree
- High school graduate (high school diploma or equivalent including GED)
- Some college but no degree
- Associate degree in college (2-year)
- Bachelor's degree in college (4-year)
- Master's degree
- Doctoral degree
- Professional degree (JD, MD)

Annual Income (approximate)

Do you have employment other than MTurk?

- Yes
- No

Did you lose your job due to COVID-19?

- Yes
- No

What is your other employment?



### How often do you floss?

At least once a  day    at least once a  week    at least once a  month    at least once in  six months    at least once a  year    less than once  a year

### Health Insurance Status

- Insured
- Medicaid/Medicare
- Uninsured
- Family's/Spouse's Insurance

### Amount insured

Percent covered by insurance

Deductible

Did you lose health insurance due to COVID-19 related reasons (e.g., job loss, budget cuts, inability to pay for health insurance)?

- Yes  
 No

Please describe the reason you lost your health insurance due to COVID-19

## Trust In Doctors

Please answer the following question regarding medical doctors.

|                                                                                                         | Strongly Disagree     | Disagree              | Neutral               | Agree                 | Strongly Agree        |
|---------------------------------------------------------------------------------------------------------|-----------------------|-----------------------|-----------------------|-----------------------|-----------------------|
| Sometimes doctors care more about what is convenient for them than about their patient's medical needs. | <input type="radio"/> | <input type="radio"/> | <input type="radio"/> | <input type="radio"/> | <input type="radio"/> |
| Doctors are extremely thorough and helpful.                                                             | <input type="radio"/> | <input type="radio"/> | <input type="radio"/> | <input type="radio"/> | <input type="radio"/> |
| You completely trust doctors' decisions about which medical treatments are best.                        | <input type="radio"/> | <input type="radio"/> | <input type="radio"/> | <input type="radio"/> | <input type="radio"/> |
| A doctor would never mislead you about anything                                                         | <input type="radio"/> | <input type="radio"/> | <input type="radio"/> | <input type="radio"/> | <input type="radio"/> |
| All in all, you trust doctors completely                                                                | <input type="radio"/> | <input type="radio"/> | <input type="radio"/> | <input type="radio"/> | <input type="radio"/> |
|                                                                                                         | Strongly Disagree     | Disagree              | Neutral               | Agree                 | Strongly Agree        |

## Fagerstrom Nicotine

Do you smoke cigarettes?

- Yes
- No

How soon after you wake up do you smoke your first cigarette?

- Within 5 minutes
- 6 - 30 minutes
- 31 - 60 minutes
- After 60 minutes

Do you find it difficult to refrain from smoking in places where it is forbidden?

- Yes
- No

Which cigarette would you hate most to give up?

- The first one in the morning
- All others

How many cigarettes a day do you smoke?

- 10 or less
- 11 - 20
- 21 - 30
- 31 or more

Do you smoke more frequently during the first hours after waking than during the rest of the day?

- Yes
- No

Do you smoke more frequently during the first hours after waking than during the rest of the day?

- Yes
- No

Do you smoke if you are so ill that you are in bed most of the day?

- Yes
- No

## SF-12

In general , would you say your health is:

- Excellent
- Very good
- Good
- Fair
- Poor

The following items are about activities you might do during a typical day, does your health now limit you in these activities? If so, how much?

|                                                                                                  | Yes, limited a lot    | Yes, limited a little | No, not limited at all |
|--------------------------------------------------------------------------------------------------|-----------------------|-----------------------|------------------------|
| Moderate activities, such as moving a table, pushing a vacuum cleaner, bowling, or playing golf. | <input type="radio"/> | <input type="radio"/> | <input type="radio"/>  |
| Climbing several flights of stairs                                                               | <input type="radio"/> | <input type="radio"/> | <input type="radio"/>  |

During the past 4 weeks, have you had any of the following problems with your work or other regular daily activities as a result of your physical health?

|                                                | Yes                   | No                    |
|------------------------------------------------|-----------------------|-----------------------|
| Accomplished less than you would like          | <input type="radio"/> | <input type="radio"/> |
| Were limited in the kind of work or activities | <input type="radio"/> | <input type="radio"/> |

During the past 4 weeks, have you had any of the following problems with your work or other regular daily activities as a result of any emotional problems (such as feeling depressed or anxious)?

|                                                          | Yes                   | No                    |
|----------------------------------------------------------|-----------------------|-----------------------|
| Accomplished less than you would like                    | <input type="radio"/> | <input type="radio"/> |
| Didn't do work or other activities as carefully as usual | <input type="radio"/> | <input type="radio"/> |

During the past 4 weeks, how much did pain interfere with your normal work (including both work outside the home and housework)?

- Not at all
- A little bit
- Moderately
- Quite a bit
- Extremely

These questions are about how you feel and how things have been with you during the past 4 weeks. For each questions, please give the answer that comes closest to the way you have been feeling.

How much time in the past 4 weeks .

|                                     | All of the time       | Most of the time      | A good bit of the time | Some of the time      | A little bit of the time | None of the time      |
|-------------------------------------|-----------------------|-----------------------|------------------------|-----------------------|--------------------------|-----------------------|
| Have you felt calm and peaceful?    | <input type="radio"/> | <input type="radio"/> | <input type="radio"/>  | <input type="radio"/> | <input type="radio"/>    | <input type="radio"/> |
| Did you have a lot of energy?       | <input type="radio"/> | <input type="radio"/> | <input type="radio"/>  | <input type="radio"/> | <input type="radio"/>    | <input type="radio"/> |
| Have you felt downhearted and blue? | <input type="radio"/> | <input type="radio"/> | <input type="radio"/>  | <input type="radio"/> | <input type="radio"/>    | <input type="radio"/> |

During the past 4 weeks, how much of the time has your physical health or emotional problems interfered with your social activities (like visiting with friends, relatives, etc.)?

- All of the time
- Most of the time
- Some of the time
- A little of the time
- None of the time

## Underlying conditions and insurance questions

Please answer the following questions:

- |                                                                     | Yes                   | No                    |
|---------------------------------------------------------------------|-----------------------|-----------------------|
| Have you ever avoided going to a doctor for an illness due to cost? | <input type="radio"/> | <input type="radio"/> |
| Have you ever delayed going to a doctor for an illness due to cost? | <input type="radio"/> | <input type="radio"/> |

Please describe in more detail your experience of delaying/refusing /avoiding some medical procedure/visit due to cost.



Please answer the following questions:

- |                                                                  | Yes                   | No                    |
|------------------------------------------------------------------|-----------------------|-----------------------|
| Do you have an underlying health condition?                      | <input type="radio"/> | <input type="radio"/> |
| Do you have a family member with an underlying health condition? | <input type="radio"/> | <input type="radio"/> |
| Do you have any close friends with underlying health conditions? | <input type="radio"/> | <input type="radio"/> |

Please describe your, your family member's, or your friend's underlying health condition.

**Comment Block**

Please comment on your decision making processes when answering the hypothetical decision-making questions.

### completion break success

You have successfully completed the survey. The next page has your completion ID, please follow the instructions on that page to receive the completion ID and complete the survey. Prior to this, please complete the Captcha.

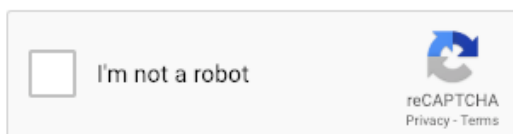

### Completion ID Success

Your completion ID is \${e://Field/Success%20ID}, make sure you save this number as this indicates you have completed the survey.

Please paste this number \${e://Field/Success%20ID} into MTurk before pressing next . If you press next without saving the number, you may not be compensated for your participation.

After submitting this code into MTurk, you will be compensated \$3.50 for completing the survey in it's entirety.

When you press next, you will have completed the survey.

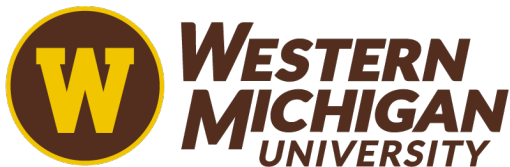

Powered by Qualtrics
